# Supplementary material for: Familiäre Determinanten des Medienkonsums im ersten Lebensjahr und die Rolle von familienunterstützenden Angeboten
Source: Atypon-hosted journal article supplement (doi:10.1026/2191-9186/a000665), 2024-04-01
Supplement: 2191-9186_a000665_esm1.pdf [file 2191-9186_a000665_esm1.pdf]

## Elektronische Supplemente ESM 1

**Tabelle E1.** Deskriptive Statistiken und Kontakthäufigkeit zwischen Säugling und Medien. Fragestellung: „Wie häufig hat Ihr Kind Kontakt mit den folgenden Medien?“

|                    | <i>M (SD)</i> | Nie    | Weniger als<br>einmal die<br>Woche | 1–2<br>Tage/Woche | 3–4<br>Tage/Woche | 5–6<br>Tage/Woche | Täglich | Mehrmals<br>täglich |
|--------------------|---------------|--------|------------------------------------|-------------------|-------------------|-------------------|---------|---------------------|
| Kontakt Fernseher  | 2.88 (2.36)   | 53,1 % | 8,9 %                              | 3,4 %             | 4,5 %             | 2,2 %             | 17,9 %  | 10,1 %              |
| Kontakt Smartphone | 2.69 (2.30)   | 57,2 % | 5,8 %                              | 7,5 %             | 2,9 %             | 4,6 %             | 10,4 %  | 10,1 %              |
| Kontakt Laptop     | 1.17 (0.76)   | 91,6 % | 4,8 %                              | 1,8 %             | 0,6 %             | 0,0 %             | 0,0 %   | 1,2 %               |
| Kontakt Tablet     | 1.21 (0.87)   | 92,2 % | 1,8 %                              | 3,6 %             | 0,6 %             | 0,0 %             | 0,6 %   | 1,2 %               |

*Anmerkungen:* Prozentangaben beziehen sich auf die gültigen Fälle. Skalierung: 1 = *Nie*, 2 = *Weniger als einmal pro Woche*, 3 = *1–2 Tage pro Woche*, 4 = *3–4 Tage pro Woche*, 5 = *5–6 Tage pro Woche*, 6 = *Täglich*, 7 = *Mehrmals Täglich*.

**Tabelle E2.** Deskriptive Statistiken zur Nutzung von Medien zur Ablenkung. Fragestellung: „Wie häufig nutzen Sie (mobile) Mediengeräte bei Ihrem Kind für Folgendes?“

|                                                                      | <i>M (SD)</i> | Gar nicht | Einmal pro<br>Woche | Mehrmals pro<br>Woche | Einmal täglich | Mehrmals<br>täglich |
|----------------------------------------------------------------------|---------------|-----------|---------------------|-----------------------|----------------|---------------------|
| „Zur Förderung des Kindes“                                           | 1.74 (1.22)   | 66,3 %    | 12,2 %              | 7,0 %                 | 9,9 %          | 4,7 %               |
| „Zur Ablenkung, wenn Sie Zeit für etwas anderes brauchen“            | 1.85 (1.27)   | 62,2 %    | 11,6 %              | 10,5 %                | 10,5 %         | 5,2 %               |
| „Zur Ablenkung des Kindes, wenn Sie sich entspannen wollen“          | 1.59 (1.13)   | 74,1 %    | 7,6 %               | 5,9 %                 | 9,4 %          | 2,9 %               |
| „Um Ihr Kind zu beruhigen (z.B., wenn es überaktiv/aufgebracht ist)“ | 1.76 (1.23)   | 66,6 %    | 10,0 %              | 9,4 %                 | 9,4 %          | 4,7 %               |
| „Um Ihr Kind zu beschäftigen“                                        | 1.85 (1.30)   | 63,3 %    | 11,2 %              | 8,3 %                 | 11,2 %         | 5,9 %               |

*Anmerkungen:* Prozentangaben beziehen sich auf die gültigen Fälle. Skalierung: 1 = *Gar nicht*, 2 = *Einmal pro Woche*, 3 = *Mehrmals pro Woche*, 4 = *Einmal täglich*, 5 = *Mehrmals Täglich*. Das Item „Zur Förderung des Kindes“ ist nicht in die Skala zur Nutzung von Medien zur Ablenkung des Kindes eingeflossen.
